# Supplementary material for: Ultra-narrow-bandgap thienoisoindigo polymers: structure–property correlations in field-effect transistors
Source: Royal Society of Chemistry journal article supplement (doi:10.1039/c6tc03693g), 2016-01-01
Supplement: c6tc03693g1.pdf [file c6tc03693g1.pdf]

**Electronic Supplementary Information**

**Ultra-Narrow-Bandgap Thienoisindigo Polymers:  
Structure–Property Correlations in Field-Effect Transistors**

Gyoungsik Kim,<sup>‡a</sup> Hyoeun Kim,<sup>‡b</sup> Moonjeong Jang,<sup>a,b</sup> Yun Kyung Jung,<sup>a</sup> Joon Hak Oh<sup>\*b</sup> and  
Changduk Yang<sup>\*a</sup>

<sup>a</sup>Department of Energy Engineering, School of Energy and Chemical Engineering, Low Dimensional Carbon Materials Center, Ulsan National Institute of Science and Technology (UNIST), 50 UNIST-gil, Ulju-gun, Ulsan 44919, South Korea.

<sup>b</sup>Department of Chemical Engineering, Pohang University of Science and Technology (POSTECH), 77 Cheongam-ro, Pohang, Gyeongbuk 37673, South Korea.

<sup>‡</sup>These authors contributed equally.

\*E-mail: [joonhoh@postech.ac.kr](mailto:joonhoh@postech.ac.kr) and [yang@unist.ac.kr](mailto:yang@unist.ac.kr)

| <b>Table of Contents</b>                                                                            | <b>Page number</b> |
|-----------------------------------------------------------------------------------------------------|--------------------|
| ♦ Instrumentation details                                                                           | S3~S4              |
| ♦ <sup>1</sup> H NMR spectra of PTIIG-based polymers                                                | S5                 |
| ♦ GPC result of PTIIG-based polymers                                                                | S6~S7              |
| ♦ GIXD images and profiles of PTIIG-based polymer films                                             | S8~S9              |
| ♦ Mobility distributions based on various temperature                                               | S10                |
| ♦ OFETs characteristics of PTIIG-based polymer films by solution-shearing method                    | S10                |
| ♦ OFETs characteristics of PTIIG-based polymer films by drop-casting method with Au electrodes      | S11                |
| ♦ OFETs characteristics of PTIIG-based polymer films by solution-shearing method with Al electrodes | S12                |

*Instrumentations:*  $^1\text{H}$  NMR spectra were recorded on a Varian VNRS 400 MHz (Varian USA) spectrophotometer using  $\text{CDCl}_3$  as solvent and tetramethylsilane (TMS). UV-Vis-NIR spectra were taken on Cary 5000 (Varian USA) spectrometer. Number-average ( $M_n$ ) and polydispersity indices (PDI) of the polymer products were determined by high temperature gel-permeation chromatography (HT-GPC) with a FUTECS NS-4000 using a series of mono disperse polystyrene standards in 1,2,4-trichlorobenzene (TCB, HPLC grade) at 120 °C. Cyclic voltammetry (CV) measurements were performed on AMETEK VersaSTAT 3 with a three-electrode cell in a nitrogen bubbled 0.1 M tetra-*n*-butylammonium hexafluorophosphate ( $n\text{-Bu}_4\text{NPF}_6$ ) solution in acetonitrile at a scan rate of 0.1 V/s at room temperature.  $\text{Ag}/\text{Ag}^+$  (0.01 M of  $\text{AgNO}_3$  in acetonitrile) electrode, platinum wire and polymer coated glassy carbon electrode were used as the reference electrode, counter electrode and working electrode, respectively. The  $\text{Ag}/\text{Ag}^+$  reference electrode was calibrated using a ferrocene/ferrocenium redox couple as an external standard, whose oxidation potential is set at  $-4.8$  eV with respect to zero vacuum level. The HOMO energy levels were obtained from the equation  $\text{HOMO} = -(\text{E}_{\text{ox}}^{\text{onset}} - \text{E}_{(\text{ferrocene})}^{\text{onset}} + 4.8)$  eV. The LUMO levels of polymers were obtained from the equation  $\text{LUMO} = -(\text{E}_{\text{red}}^{\text{onset}} - \text{E}_{(\text{ferrocene})}^{\text{onset}} + 4.8)$  eV.

*AFM Characterization:* Agilent 5500 scanning probe microscope (SPM) running with a Nanoscope V controller was used to obtain AFM images of polymer films. AFM images were recorded in high-resolution tapping mode under ambient conditions. Premium silicon cantilevers (TESP-V2) were used with a rotated tip to provide more symmetric representation of features over 200 nm.

*GIXD Characterization:* Grazing incidence X-ray diffraction (GIXD) measurements were conducted at PLS-II 9A U-SAXS beamline of the Pohang Accelerator Laboratory in Korea. The X-rays coming from the in-vacuum undulator (IVU) are monochromated (wavelength  $\lambda = 1.10994 \text{ \AA}$ ) using a double crystal monochromator and focused both horizontally and vertically ( $450 \text{ (H)} \times 60 \text{ (V)} \mu\text{m}^2$  in FWHM @ sample position) using K-B type mirrors. The GIXD sample stage is equipped with a 7-axis motorized stage for the fine alignment of sample, and the incidence angle of X-ray beam was set to be  $0.120^\circ$  to  $0.135^\circ$  for TIIG-based polymer films. GIXD patterns were recorded with a 2D CCD detector (Rayonix SX165) and X-ray irradiation time was 6–9 s, dependent on the saturation level of the detector. Diffraction angles were calibrated with a pre-calibrated sucrose (Monoclinic, P21,  $a = 10.8631 \text{ \AA}$ ,  $b = 8.7044 \text{ \AA}$ ,  $c = 7.7624 \text{ \AA}$ ,  $\beta = 102.938^\circ$ ), and the sample-to-detector distance was  $\sim 231 \text{ mm}$ .

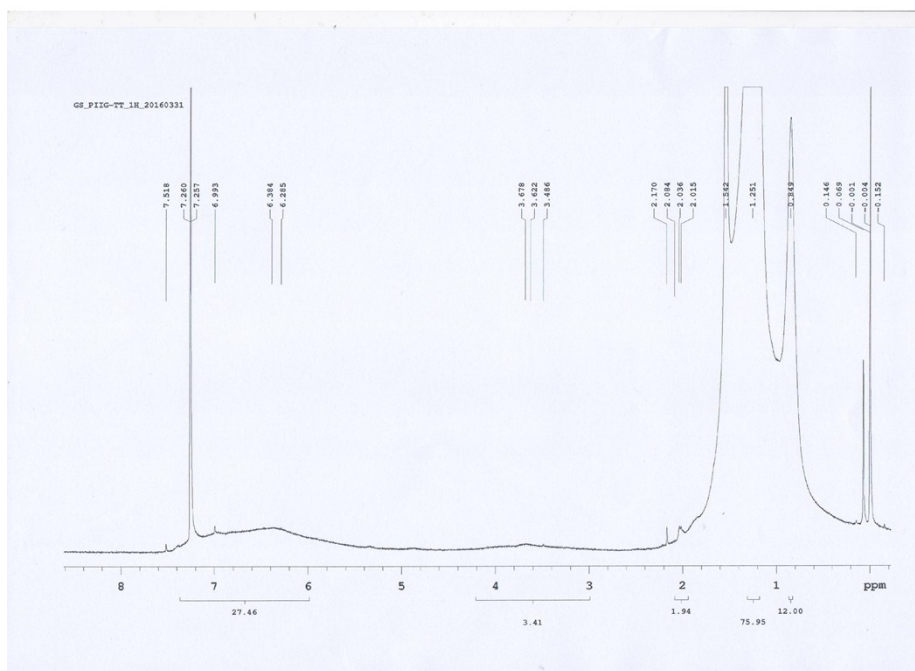

**Figure S1.**  $^1\text{H}$  NMR result of PTIIG-TT.

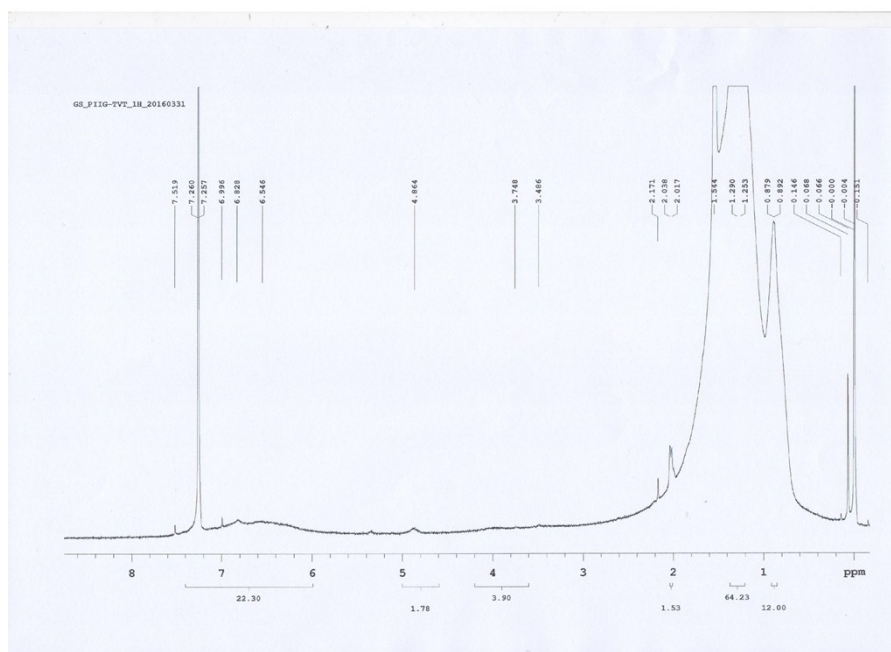

**Figure S2.**  $^1\text{H}$  NMR result of PTIIG-TVT.

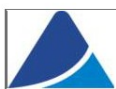

# Clarity GPC Report

DataApex  
www.dataapex.com

## Chromatogram Info:

File Name : D:\ DATA\ Desktop\ DATA\ 2015-08-20\ 2015-08-20 오후 2\_27\_57 - PTIIG-TT.PRM File Created : 2015-08-20 오후 3:01:22  
Origin : Acquired, Acquisition started 2015-08-20 오후 2:27:57 Acquired Date : 2015-08-20 오후 2:57:57  
Project : C:\ Clarity\ Projects\ Work1.PRJ By : Administrator

## Printed Version Info:

Printed Version : 2016-08-11 오후 4:59:06 Recent (Linked Calibration) Printed Date : 2016-08-11 오후 5:09:10  
Report Style : C:\ Clarity\ Common\ gpc\_result.sty By : Administrator  
Calibration File : C:\ Clarity\ WORK1\ Calib\ Standard\_20150812.CAL

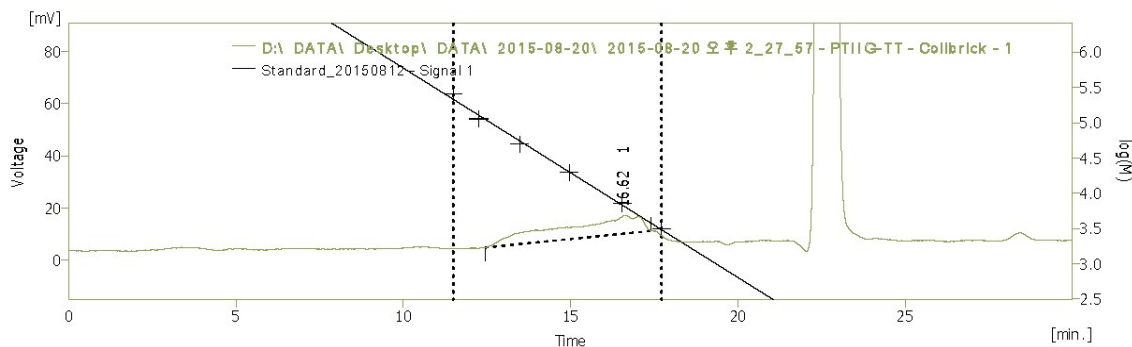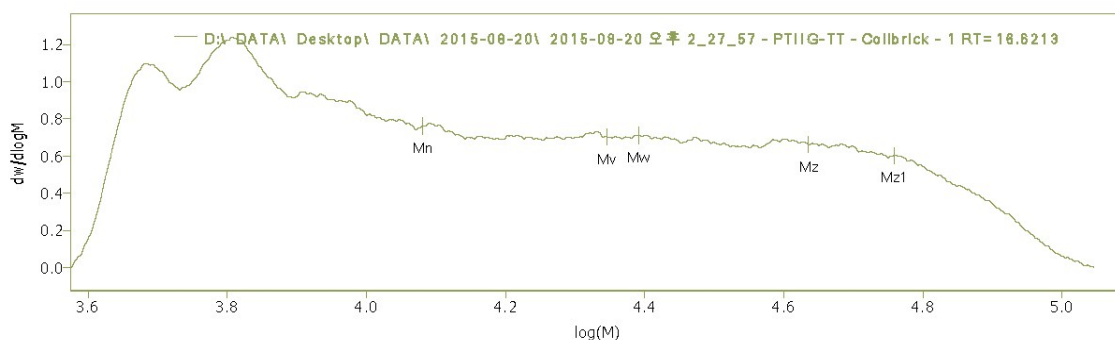

Result Table (Standard\_20150812 - Narrow - D:\ DATA\ Desktop\ DATA\ 2015-08-20\ 2015-08-20 오후 2\_27\_57 - PTIIG-  
Equation:  $Y = -0.29716 \cdot X + 8.74608$   
Correlation Factor: 0.9976854

|  | Start RT | End RT | Flow Rate<br>Correction | Mp   | Mn    | Mw    | Mz    | Mz1   | Mv    | PD     |
|--|----------|--------|-------------------------|------|-------|-------|-------|-------|-------|--------|
|  | 12.45    | 17.40  | 1.0000                  | 6411 | 12054 | 24609 | 43215 | 57363 | 22150 | 2.0415 |

**Figure S3. GPC result of PTIIG-TT**

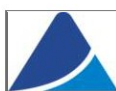

# Clarity GPC Report

DataApex  
www.dataapex.com

## Chromatogram Info:

File Name : D:\ DATA\ Desktop\ DATA\ 2015-08-20\ 2015-08-20 오후 3\_51\_05 - PTIIG-TVT\_new.PRM  
Origin : Acquired, Acquisition started 2015-08-20 오후 3:51:05  
Project : C:\ Clarity\ Projects\ Work1\PRJ

File Created : 2015-08-20 오후 4:21:05  
Acquired Date : 2015-08-20 오후 4:21:05  
By : Administrator

## Printed Version Info:

Printed Version : 2016-08-11 오후 5:06:53 Recent (Linked Calibration)  
Report Style : C:\ Clarity\ Common\ gpc\_result.sty  
Calibration File : C:\ Clarity\ WORK1\ Calib\ Standard\_20150812.CAL

Printed Date : 2016-08-11 오후 5:08:27  
By : Administrator

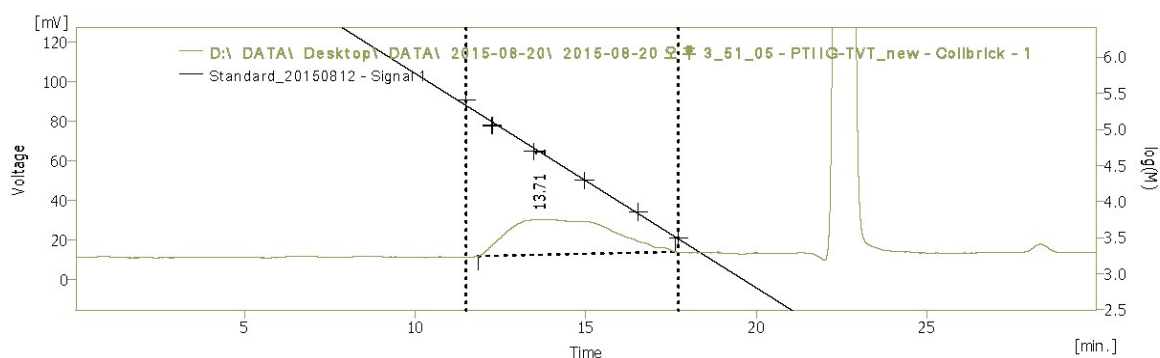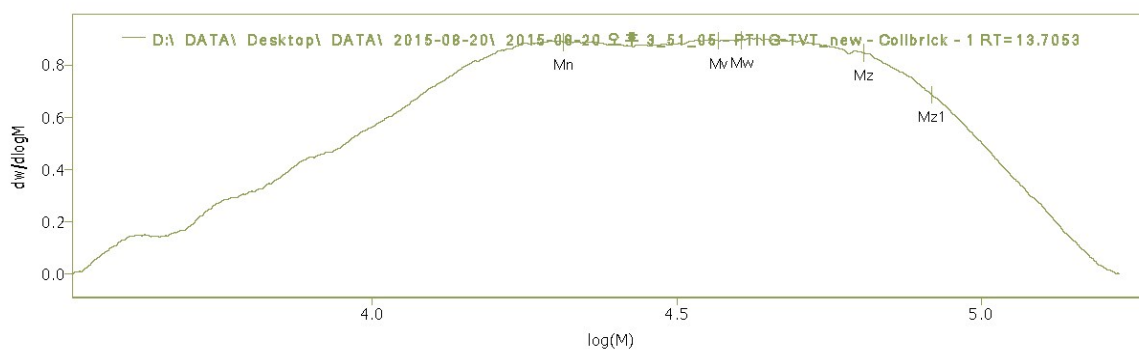

Result Table (Standard\_20150812 - Narrow - D:\ DATA\ Desktop\ DATA\ 2015-08-20\ 2015-08-20 오후 3\_51\_05 - PTIIG-TV  
Equation:  $Y = -0.29716 * X + 8.74608$   
Correlation Factor: 0.9976854

|  | Start RT | End RT | Flow Rate<br>Correction | Mp    | Mn    | Mw    | Mz    | Mz1   | Mv    | PD     |
|--|----------|--------|-------------------------|-------|-------|-------|-------|-------|-------|--------|
|  | 11.85    | 17.63  | 1.0000                  | 47148 | 20585 | 40357 | 64016 | 82923 | 37037 | 1.9605 |

**Figure S4. GPC result of PTIIG-TVT**

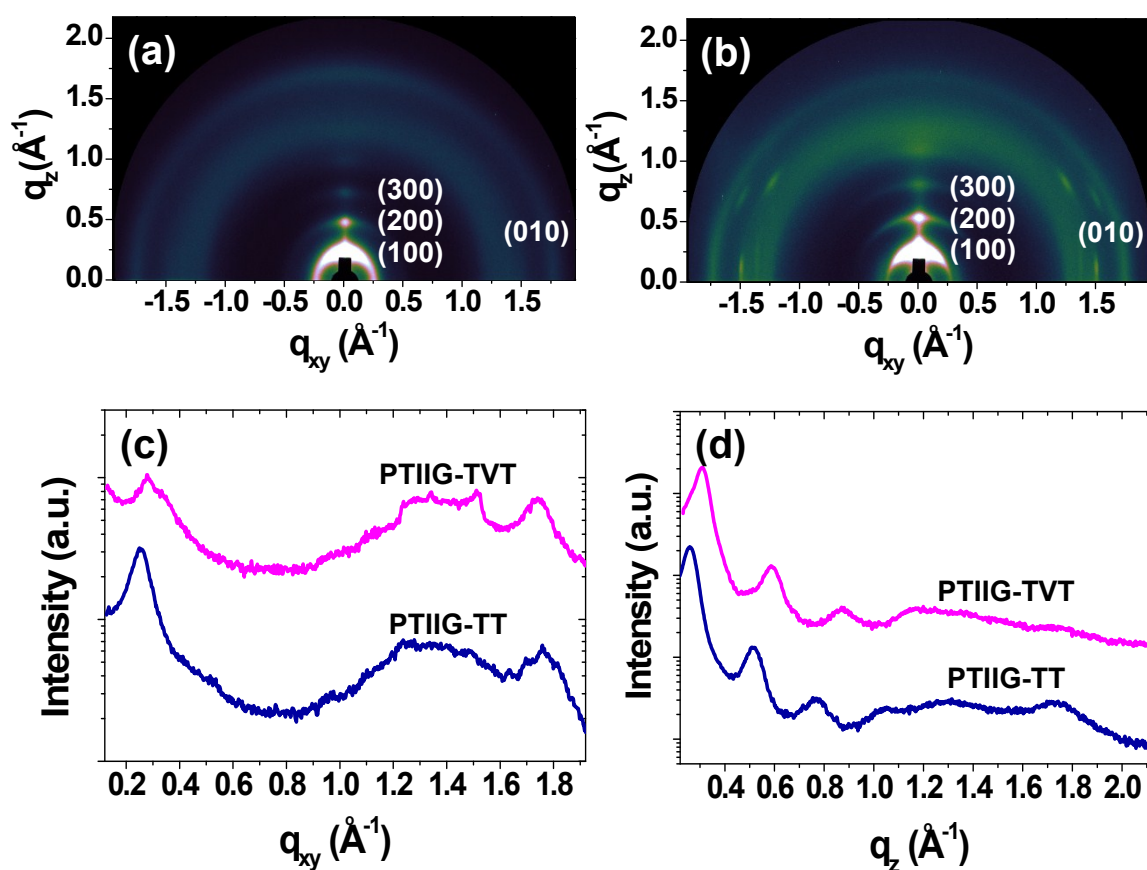

**Figure S5** GIXD images of solution-sheared TIIG-based polymer films: (a) **PTIIG-TT** and (b) **PTIIG-TVT**. The corresponding GIXD diffractogram profiles: (c) in-plane and (d) out-of-plane GIXD patterns.

**Table S1 Crystallographic parameters calculated from GIXD profiles.**

| Annealing Temperature | Crystallographic parameters |                                   | PTIIG-TT | PTIIG-TVT |
|-----------------------|-----------------------------|-----------------------------------|----------|-----------|
| As-cast               | (100)                       | q ( $\text{\AA}^{-1}$ )           | 0.2843   | 0.3101    |
|                       |                             | d-spacing ( $\text{\AA}$ )        | 22.10    | 20.26     |
|                       |                             | FWHM ( $\text{\AA}^{-1}$ )        | 0.0655   | 0.0760    |
|                       |                             | Coherence length ( $\text{\AA}$ ) | 86.4     | 74.4      |
|                       | $\pi$ - $\pi$ stacking      | q ( $\text{\AA}^{-1}$ )           | 1.7442   | 1.7483    |
|                       |                             | d-spacing ( $\text{\AA}$ )        | 3.60     | 3.59      |
| Annealing at 300 °C   | (100)                       | q ( $\text{\AA}^{-1}$ )           | 0.2933   | 0.3022    |
|                       |                             | d-spacing ( $\text{\AA}$ )        | 21.42    | 20.79     |
|                       |                             | FWHM ( $\text{\AA}^{-1}$ )        | 0.0317   | 0.0268    |
|                       |                             | Coherence length ( $\text{\AA}$ ) | 178.4    | 211.1     |
|                       | $\pi$ - $\pi$ stacking      | q ( $\text{\AA}^{-1}$ )           | 1.7423   | 1.7590    |
|                       |                             | d-spacing ( $\text{\AA}$ )        | 3.61     | 3.57      |

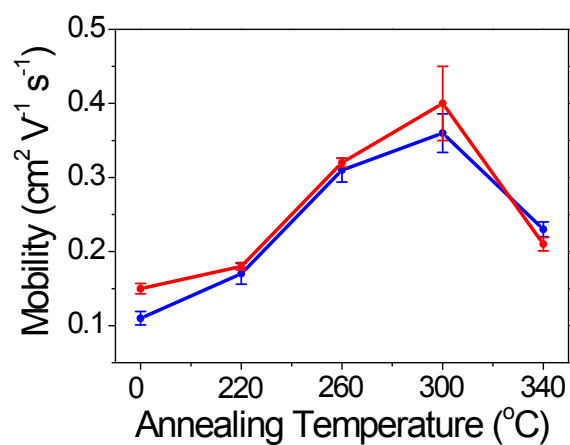

**Figure S6** Average hole mobility distributions of solution-sheared TIIG-based polymer films based on various annealing temperatures.

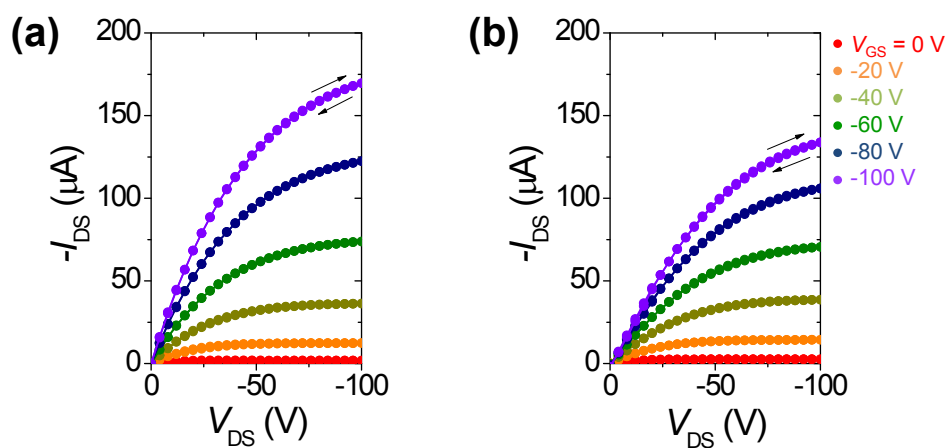

**Figure S7** Output characteristics of PTIIG-based polymer films fabricated by solution-shearing method: (a) **PTIIG-TT** and (b) **PTIIG-TVT**.

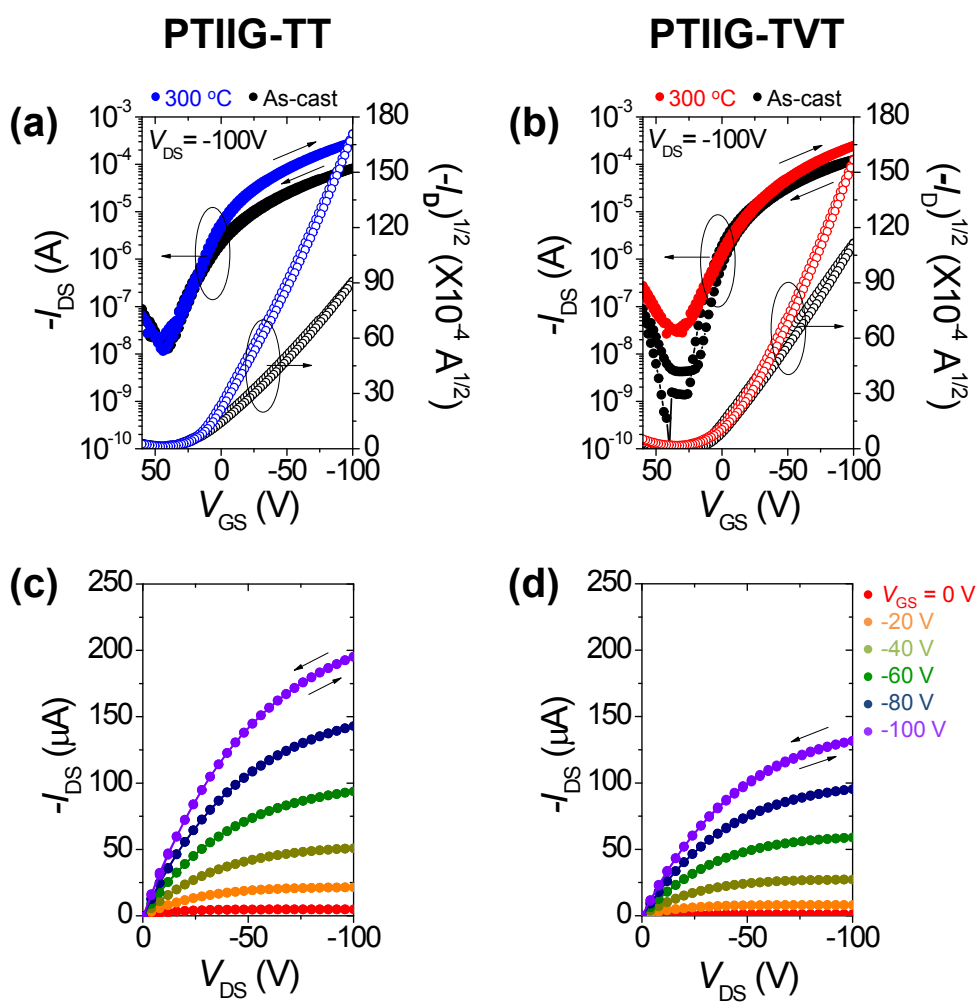

**Figure S8** Current-voltage ( $I$ - $V$ ) characteristics of OFET devices of PTIIG-based polymer films fabricated by drop-casting method, with Au electrodes: (a, c) **PTIIG-TT** and (b, d) **PTIIG-TVT**.

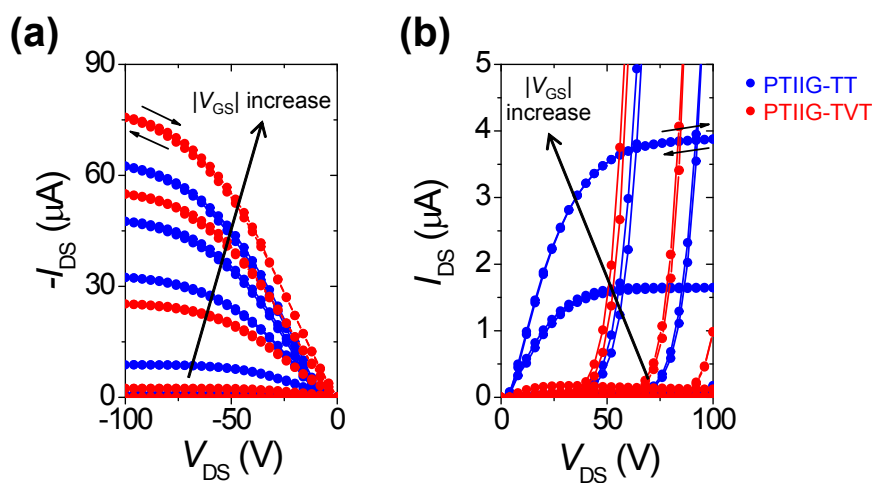

**Figure S9** Output characteristics of OFETs with Al electrodes based on solution-sheared TIIG-based polymer films annealed at 300 °C: (a) hole-enhancement operation,  $V_{DS} = -100$  V and (b) electron-enhancement operation,  $V_{DS} = +100$  V.
